# Supplementary material for: A neurodevelopmental disorder mutation locks G proteins in the transitory pre-activated state
Source: PubMed Central journal article supplement — Nat Commun. 2024 Aug 5;15:6643. doi: 10.1038/s41467-024-50964-z (PMC11300612; doi:10.1038/s41467-024-50964-z), 2024-08-05
Supplement: 41467_2024_50964_MOESM1_ESM.pdf [file 41467_2024_50964_MOESM1_ESM.pdf]

## Supplementary Table 1 Cryo-EM Data Collection, Refinement, and Validation Statistics

| <b>Data Collection and Processing</b>  | <b>D2-GoA<sup>K46E</sup></b> | <b>DRD2-GoA<sup>K46E</sup>-scFv16</b> |
|----------------------------------------|------------------------------|---------------------------------------|
| EMDB Accession Number                  |                              |                                       |
| PDB Accession Number                   |                              |                                       |
| Voltage (kV)                           | 200                          | 200                                   |
| Electron exposure (e-/Å <sup>2</sup> ) | 55.0                         | 55.0                                  |
| Number of movies                       | 3161                         | 3827                                  |
| Defocus range (µm)                     | -0.1 to -2.8                 | -0.1 to -2.8                          |
| Defocus Mean (SD) µm <sup>1</sup>      | 1.1(0.4)                     | 1.4(0.4)                              |
| Physical Pixel Size (Å)                | 0.88                         | 0.88                                  |
| Particles for 3D classification        | 296,893                      | 332,959                               |
| Particles for final map                | 153,270                      | 216,188                               |
| Map Resolution (Å) <sup>2</sup>        | 3.28                         | 3.20                                  |
| Symmetry Imposed                       | C1                           | C1                                    |
| FSC Threshold                          | 0.143                        | 0.143                                 |
| <b>Refinement</b>                      |                              |                                       |
| Initial Model Used (GPCR/G protein)    | 8IRS/1GP2                    | 8IRS/1GP2                             |
| <b>Model composition</b>               |                              |                                       |
| Non-hydrogen atoms                     | 8001                         | 8799                                  |
| Protein residues                       | 1015                         | 1123                                  |
| Ligands                                | 1                            | 1                                     |
| Lipids                                 | 0                            | 0                                     |
| <b>Mean B-factors (Å<sup>2</sup>)</b>  |                              |                                       |
| Protein                                | 102.6                        | 82.8                                  |
| Ligand                                 | 20.0                         | 66.6                                  |
| <b>RMSD</b>                            |                              |                                       |
| Bond length (Å)                        | 0.004                        | 0.003                                 |
| Bond angle (°)                         | 0.881                        | 0.682                                 |
| <b>Validation</b>                      |                              |                                       |
| MolProbity score                       | 1.39                         | 1.53                                  |
| Clash score                            | 5.69                         | 9.29                                  |
| Poor rotamer (%)                       | 0.23                         | 0.31                                  |
| <b>Ramachandran Plot</b>               |                              |                                       |
| Favored (%)                            | 97.6                         | 97.8                                  |
| Allowed (%)                            | 2.4                          | 2.2                                   |
| Disallowed (%)                         | 0.00                         | 0.00                                  |

<sup>1</sup> Underfocus

<sup>2</sup> Resolution estimates from cryoSPARC auto-corrected GSFSC

NA – Not Applicable

## Supplementary Table 2 | D1R/D2R Orthosteric Contact Summary List

| <b>BW*</b> | <b>D2R/GoA (KE)</b> | <b>D2R/GoA (KE)/scFv16</b> | <b>D2R/Rotigotine (PDB ID 8IRS)</b> | <b>D1R/Dopamine (PDB ID 7F1O)</b> |
|------------|---------------------|----------------------------|-------------------------------------|-----------------------------------|
| 2.61       |                     |                            | V91                                 |                                   |
| 2.64       |                     |                            | L94                                 |                                   |
| 3.32       | D114                | D114                       | D114                                | D103                              |
| 3.33       | V115                | V115                       | V115                                | I104                              |
| 3.36       | C118                | C118                       | C118                                | S107                              |
| 3.37       | T119                | T119                       | T119                                | T108                              |
| E12        |                     |                            | I183                                |                                   |
| E12        | I184                |                            | I184                                | L190                              |
| 5.38       | F189                | F189                       |                                     | Y194                              |
| 5.39       |                     |                            |                                     |                                   |
| 5.42       | S193                | S193                       | S193                                | S198                              |
| 5.43       |                     |                            |                                     |                                   |
| 5.46       | S197                | S197                       | S197                                | S202                              |
| 6.48       | W386                | W386                       | W386                                | W285                              |
| 6.51       | F389                | F389                       | F389                                | F288                              |
| 6.52       | F390                | F390                       | F390                                | F289                              |
| 6.55       | H393                | H393                       | H393                                | N292                              |
| 7.35       |                     |                            | Y408                                |                                   |
| 7.39       | T412                | T412                       | T412                                | V317                              |
| 7.43       | Y416                | Y416                       | Y416                                | W321                              |

\*Ballesteros-Weinstein Designation

Supplementary Table 3 | D2R to GoA<sup>K46E</sup> Contact Summary List

| CGN   | D2/GoA (KE) | D2R   | BW   |
|-------|-------------|-------|------|
| S1.2  | V34         | M140* | ICL2 |
| S3.1  | L195        | M140* | ICL2 |
| N/A   | N316        | K367  | 6.29 |
| H5.13 | D341        | R219* | 5.68 |
|       |             | V223  | 5.72 |
| H5.15 | I343        | P139* | ICL2 |
|       |             | M140* | ICL2 |
|       |             | N143* | ICL2 |
| H5.16 | I344        | V136* | 3.54 |
|       |             | P139* | ICL2 |
|       |             | R219  | 5.68 |
| H5.19 | N347        | A135* | 3.53 |
|       |             | P139* | ICL2 |
|       |             | Y142* | ICL2 |
|       |             | N143* | ICL2 |
| H5.20 | L348        | V136* | 3.54 |
|       |             | L216* | 5.65 |
| H5.21 | R349        | K367  | 6.29 |
| H5.23 | C351        | T69*  | 2.39 |
|       |             | R132* | 3.50 |
|       |             | A135* | 3.53 |
|       |             | Y142* | ICL2 |
| H5.25 | L353        | R132* | 3.50 |
|       |             | A371* | 6.33 |
|       |             | M374* | 6.36 |
|       |             | L375* | 6.37 |
| H5.26 | Y354        | L216* | 5.65 |
|       |             | K367  | 6.29 |
|       |             | E368* | 6.30 |
|       |             | A371* | 6.33 |

Note – BW: Ballesteros-Weinstein Designation; CGN: Common Gα Numbering (CGN) scheme; (\*) indicates shared D2R interaction between GoA<sup>K46E</sup> and G<sub>i1</sub>. N/A – no CGN numbering for this region.

Supplementary Table 4 | D2R to Gi1 (PDB 8IRS) Contact Summary List

| CGN   | D2R/Gi1 | D2    | BW   |
|-------|---------|-------|------|
| HN.48 | R24     | Y146  | 4.36 |
| N/A   | A31     | T144  | 4.34 |
| S3.1  | L194    | M140* | ICL2 |
| N/A   | E318    | E368* | 6.30 |
| H5.11 | V339    | M140* | ICL2 |
| H5.12 | T340    | P139* | ICL2 |
| H5.13 | D341    | R219* | 5.68 |
| H5.15 | I343    | P139* | ICL2 |
|       |         | M140* | ICL2 |
|       |         | N143* | ICL2 |
| H5.16 | I344    | P139* | ICL2 |
|       |         | L216* | 5.65 |
|       |         | R219* | 5.68 |
| H5.17 | K345    | R219* | 5.68 |
|       |         | E368* | 6.30 |
| H5.19 | N347    | A135* | 3.53 |
|       |         | P139* | ICL2 |
|       |         | Y142* | ICL2 |
|       |         | N143* | ICL2 |
| H5.20 | L348    | V136* | 3.54 |
|       |         | L216* | 5.65 |
|       |         | R219* | 5.68 |
| H5.22 | D350    | T67   | 2.37 |
|       |         | Y142* | ICL2 |
| H5.23 | C351    | T69*  | 2.39 |
|       |         | R132* | 3.50 |
|       |         | A135* | 3.53 |
|       |         | Y142* | ICL2 |
| H5.25 | L353    | R132* | 3.50 |
|       |         | V136* | 3.54 |
|       |         | I212  | 5.61 |
|       |         | L216* | 5.65 |
|       |         | A371* | 6.33 |
|       |         | M374* | 6.36 |
|       |         | L375* | 6.37 |
| H5.26 | F354    | R219* | 5.68 |
|       |         | E368* | 6.30 |
|       |         | K370  | 6.32 |
|       |         | A371* | 6.33 |

Note – BW: Ballesteros-Weinstein Designation; CGN: Common G $\alpha$  Numbering (CGN) scheme; (\*) indicates shared D2R interaction between GoA<sup>K46E</sup> and Gi<sub>1</sub>. N/A – no CGN numbering for this region.



## Supplementary Table 5 | Mutagenesis Primers

| <b>Oligo Name</b> | <b>Oligo Sequence (5' - 3')</b>               |
|-------------------|-----------------------------------------------|
| Ga13_K61E_fwd     | GCGGCGAATCCACCTTCCTGAAGCAGATGCG               |
| Ga13_K61E_rev     | GTGGATTCGCCGCTCTCGCCCGC                       |
| Ga13_R230C_fwd    | CAGAATGTAAACGTTGGTTTGAATGTTTCGACAGTG          |
| Ga13_R230C_rev    | CGTTTACATTCTGATCTCTGACCACCTACATCAACC          |
| Ga15/16_K55E_fwd  | GCGGGGAAAGCACCTTCATCAAGCAGATGCG               |
| Ga15/16_K55E_rev  | GTGCTTTCGCCGCTCTCGCCTGGG                      |
| Ga15/16_R216C_fwd | CAGAGTGTAAGAAATGGATCCATTGTTTCGAGAACGTG        |
| Ga15/16_R216C_rev | TTCTTACACTCTGACTTCTGGCCCCCGAC                 |
| Gai2_K46E_fwd     | CAGGGGAAAGCACCATCGTCAAGCAGATGAAG              |
| Gai2_K46E_rev     | GTGCTTTCGCCCTGACTCCCCAGCACCC                  |
| Gai2_R209C_fwd    | CTGAGTGTAAGAAGTGGATCCACTGCTTTGAGGG            |
| Gai2_R209C_rev    | TTCTTACACTCAGACCGCTGACCACCC                   |
| Gai3_K46E_fwd     | CTGGTGAAAGCACCATTTGTGAAACAGATGAAAATCATTGATG   |
| Gai3_K46E_rev     | GTGCTTTCACCAGATTCTCCAGCACCGAGTAG              |
| Gai3_R208C_fwd    | CAGAATGTAAAAAGTGGATTCAGTGTGTTTGGAGGGAGTG      |
| Gai3_R208C_rev    | TTTTTACATTCTGATCTTTGGCCACCTACATCAAACATC       |
| Gaq_K52E_fwd      | GTGGCGAAAGTACGTTTATCAAGCAGATGAGAATCATCCATG    |
| Gaq_K52E_rev      | GTACTTTCGCCACTCTCTCCTGTCCCGAG                 |
| Gaq_R213C_fwd     | CAGAGTGTAAGAAATGGATACACTGCTTTGAAAATGTCACC     |
| Gaq_R213C_rev     | TTTCTACACTCTGACCTTTGGCCCCCTACATC              |
| Gas_K53E_fwd      | CTGGTGAAAGCACCATTTGTGAAGCAGATGAGG             |
| Gas_K53E_rev      | GTGCTTTCACCAGATTCTCCAGCACCCAGC                |
| Gas_R231C_fwd     | ATGAATGTCGCAAGTGGATCCAGTGTGCTTCAAC            |
| Gas_R231C_rev     | TTGCGACATTCATCGCGCTGGCCACC                    |
| Gaz_K46E_fwd      | CAGGCGAAAGCACCATCGTCAAACAGATGAAGATC           |
| Gaz_K46E_rev      | GTGCTTTCGCCCTGAGTTGCTGGTGCCC                  |
| Gaz_R209C_fwd     | CAGAGTGTAAGAAAGTGGATCCACTGCTTCGAGG            |
| Gaz_R209C_rev     | TTTTTACACTCTGACCTCTGCCCCCCC                   |
| Ga11_K52E_fwd     | GCGGGGAAAGCACGTTTCATCAAGCAGATGCG              |
| Ga11_K52E_rev     | GTGCTTTCGCCGCTCTCGCCCGTG                      |
| Ga11_R213C_fwd    | CGGAGTGTAAGAAAGTGGATCCACTGCTTTGAGAAC          |
| Ga11_R213C_rev    | TTCTTACACTCCGACCGCTGGCCC                      |
| Gai1_K46E_fwd     | CTGGTGAAAGTACAATTGTGAAGCAGATGAAAATTATCCATGAAG |
| Gai1_K46E_rev     | GTACTTTCACCAGATTCACCAGCACCGAG                 |
| Gai1_R208C_fwd    | CTGAGTGTAAGAAGTGGATTCATTGCTTCGAAGGAG          |
| Gai1_R208C_rev    | TTCTTACACTCAGATCTCTGACCTCCCACATCAAAC          |
| Gao_K46E_rev      | GTGCTTTCCTCTGATTCTCCAGCCCCGAG                 |
| Gao_K46E_fwd      | CAGGAGAAAGCACCATTTGTGAAGCAG                   |
| Gao_R209C_fwd     | CTGAATGTAAGAAGTGGATCCATTGCTTCGAGGAC           |
| Gao_R209C_rev     | TTCTTACATTCAGATCGCTGGCCTCCGACGTCAAAC          |

**A**

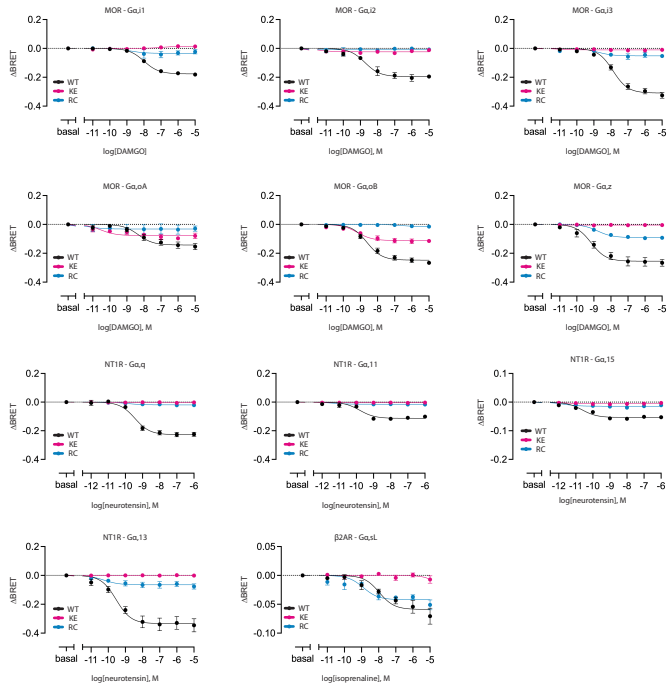

**B**

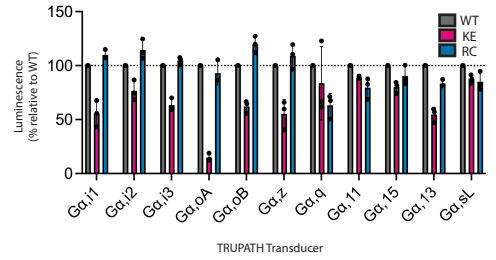

**C**

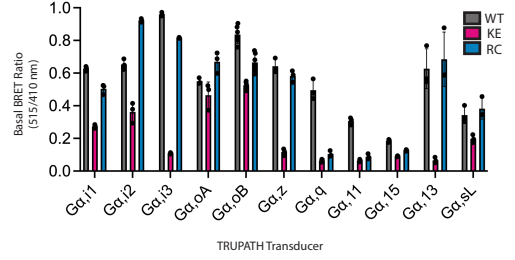

**D**

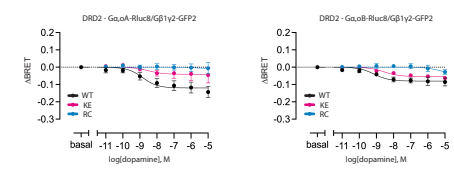

**E**

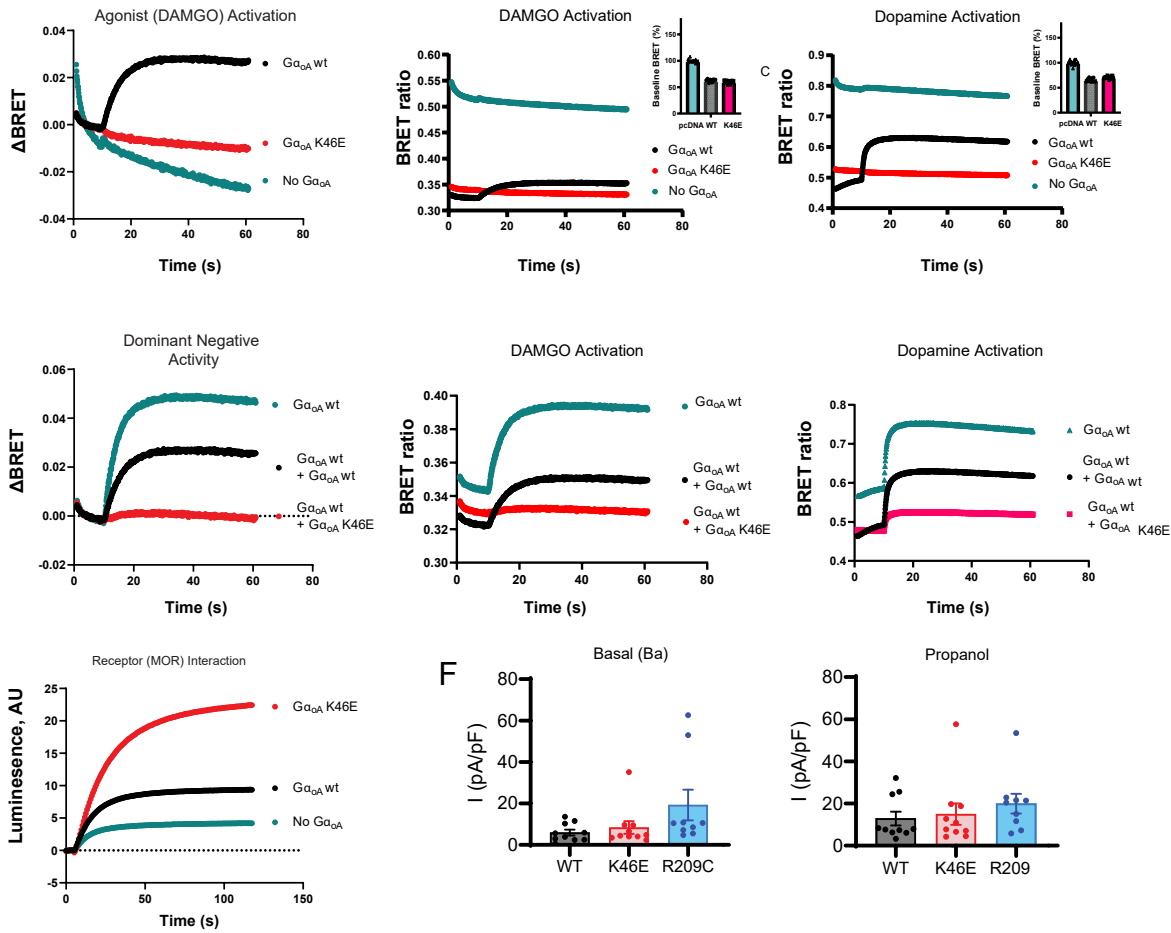

**F**

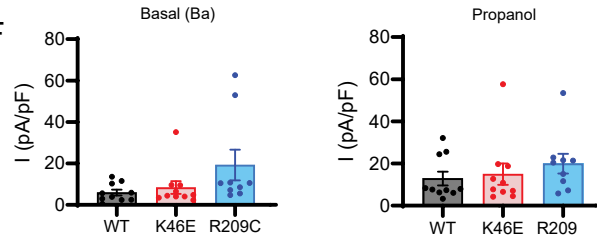

### Supplementary Figure 1. pinKE mutations impede G $\beta$ $\gamma$ dissociation.

(A) HEK293 cells transfected with the indicated receptor, the indicated subtype of WT or mutant G $\alpha$ -RLuc8 donor, G $\beta$  and G $\gamma$ -GFP acceptor proteins. Representative DAMGO, neurotensin, and isoprenaline concentration-response curves measuring G protein dissociation ( $\Delta$ BRET) using the  $\mu$ -opioid (G $_{i1}$ , G $_{i2}$ , G $_{i3}$ , G $_{i3}$ , G $_{oA}$ , G $_{oB}$ , G $_z$ ), neurotensin (G $_q$ , G $_{11}$ , G $_{13}$ , G $_{15}$ ), or  $\beta_2$ -adrenergic receptor (G $_s$ ).

(B) Expression levels of pinKE (pink) and triadRC (blue) G $\alpha$ -Rluc8 subunits normalized relative to wildtype (gray), determined using luminescence values from HEK293 cells transfected with each indicated construct. Data are means  $\pm$  SEM from 3 independent experiments, each performed with 2 replicates.

(C) Representative dopamine concentration-response curves measuring G protein dissociation ( $\Delta$ BRET) using the dopamine D $_2$  receptor (G $_{oA}$ , G $_{oB}$ ) paired with the subunits (G $\beta_1$  and G $\gamma_2$ ) used for cryo-EM structure determination. Data are means  $\pm$  SEM from 3 independent experiments, each performed with 2 replicates.

(D) Association of pinKE (pink) and triadRC (blue) G $\alpha$ -Rluc8 subunits with G $\beta$  and G $\gamma$ -GFP2 relative to wildtype (gray), determined by calculating the basal BRET ratio (515/410 nm) from HEK293 cells transfected with each indicated construct and treated with vehicle.

(E) HEK293 cells transfected with  $\mu$  opioid receptor (MOR) after agonist (DAMGO), wildtype or mutant G $\alpha_o$ , masGRK3ct-Nluc-HA donor and Venus-G $\beta\gamma$  acceptor proteins. Representative time-course measurements after agonist (DAMGO) addition presented as  $\Delta$ BRET (top). Also shown are the raw BRET values after agonist (DAMGO or dopamine) addition, presented as BRET ratio. Inset, BRET ratios before agonist addition, presented as a baseline percentage of vector control (pcDNA).

(F) Bar plot of current recordings from HEK293T transfected with the  $\mu$  opioid receptor (MOR) and wildtype or mutant G $\alpha_o$ , after treatment with barium (Ba $^{2+}$ ) or propranolol. Data are means  $\pm$  SD from 9 (R209C) or 10 (WT, K46E) independent experiments.

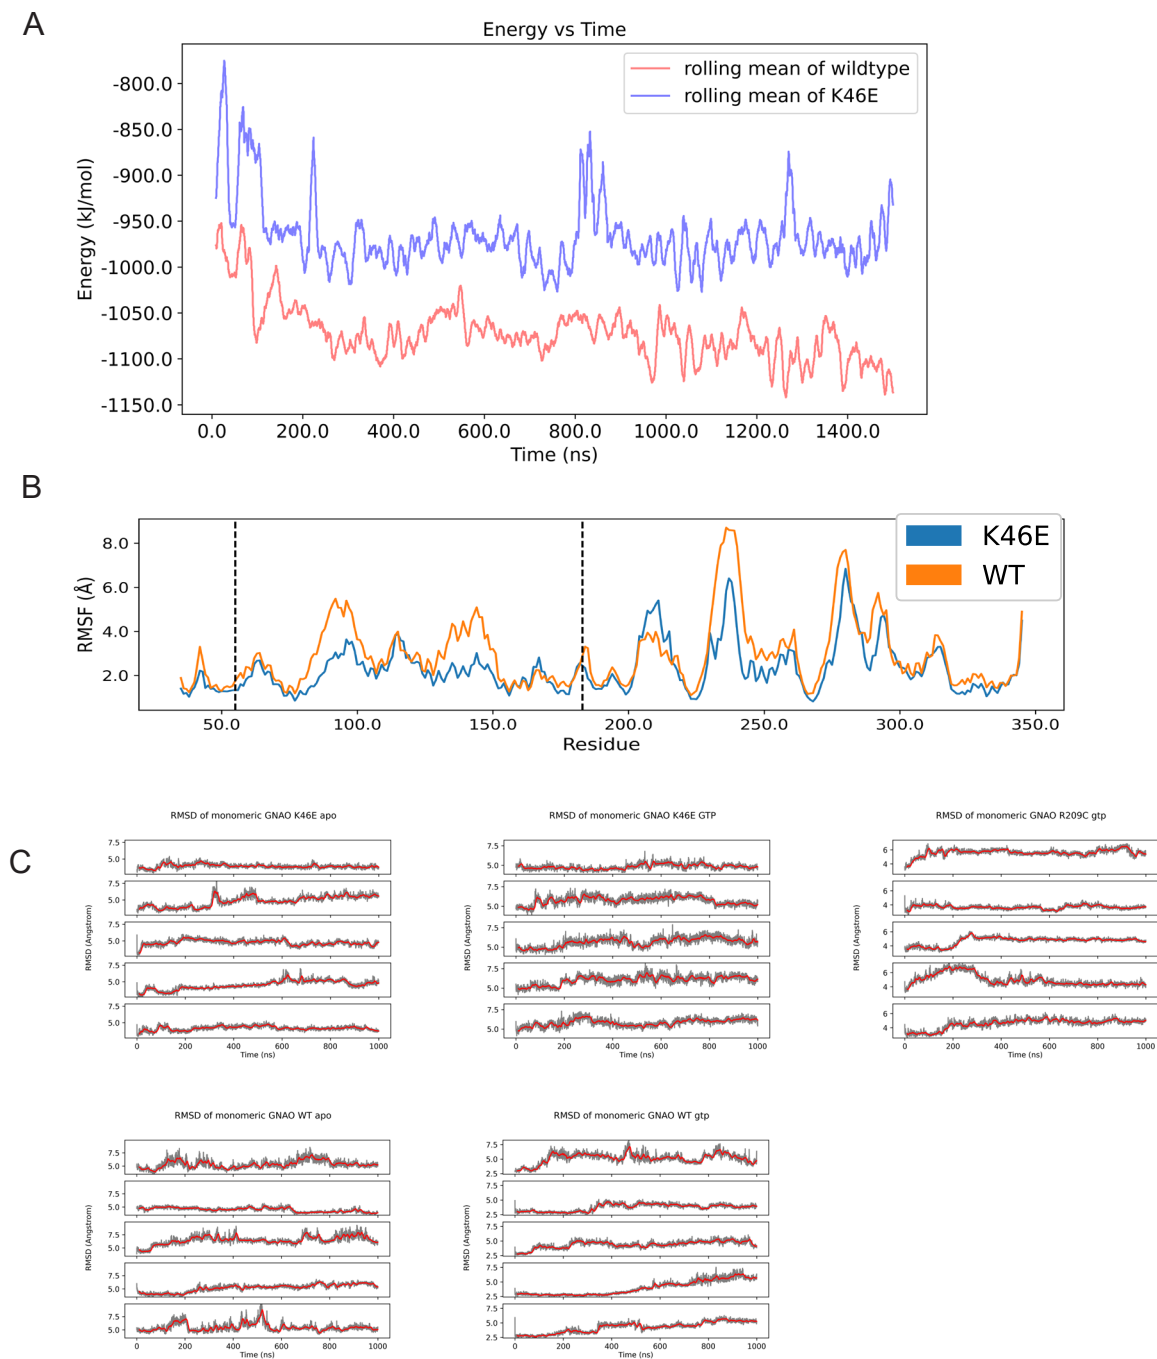

**Supplementary Figure 2. Contact frequency of residues in the GTP binding site.**

(A) Residues that show at least 30% decrease in frequency of contacts with GTP in the  $G\alpha_o^{K46E}$ -GTP system compared to those with GTP in the WT  $G\alpha_o$ -GTP system during simulations. Locations of the residues are approximate.

(B) Quantitative RMSF plot showing that the flexibility of the wildtype residues (as reflected by RMSF) are higher than those in the K46E mutant (for all but residues 206-216).

(C) C-alpha RMSD plot of each frame in a trajectory against the starting structure. Unit is in angstroms.

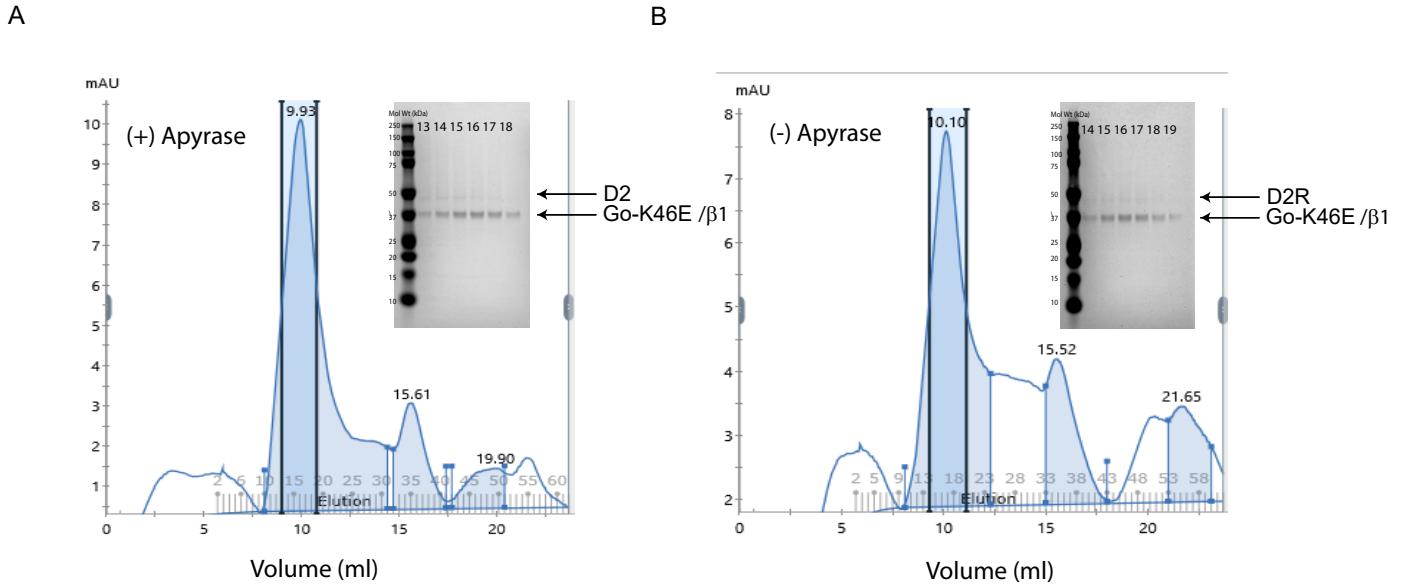

**Supplementary Figure 3. Size Exclusion Chromatography (SEC) of D2R-Go<sup>K46E</sup>-β<sub>1</sub> complex +/- apyrase.**

(A) SEC profile of complex purified in the presence of apyrase enzyme for the degradation of ATP/GTP to AMP/GMP.  
 (B) SEC profile of complex purified in the absence of apyrase enzyme representing complex formation in the presence of physiological concentrations of ATP/GTP. y-axis is displayed as absorbance units at 280 nm (mAU), x-axis is displayed as volume in milliliter (ml). Retention time is displayed above each peak. Insert is SDS gel of complex peak fractions. Molecular weight of components, D2R (50.9 kDa), Go<sup>K46E</sup> (40.0 kDa), β<sub>1</sub> (39.4 kDa), γ<sub>2</sub> (7.8 kDa) (not seen on gel).

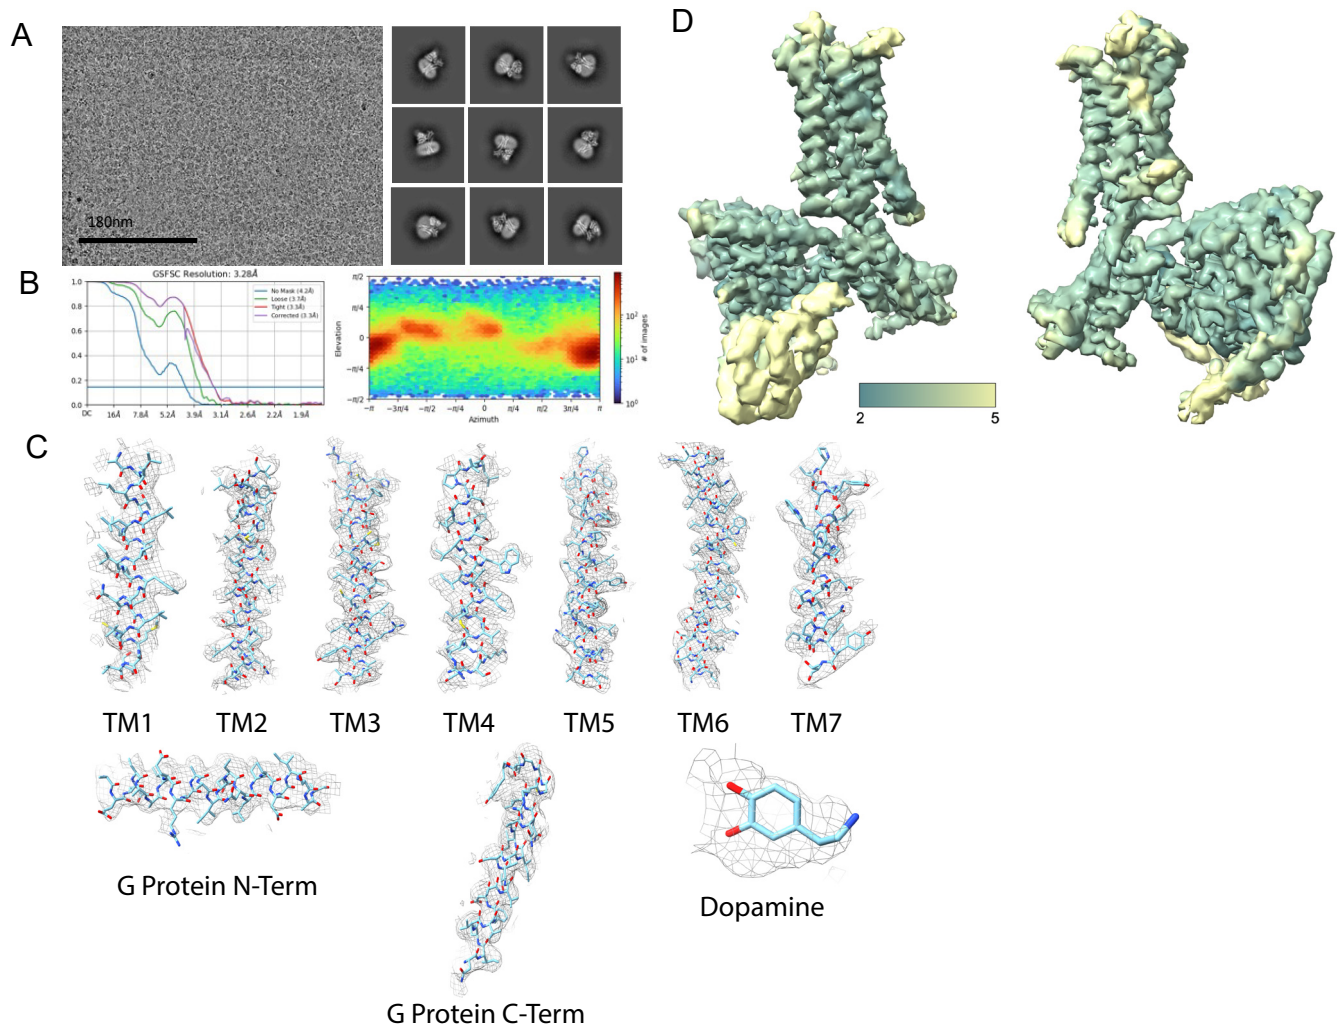

**Supplementary Figure 4. Extended Cryo-EM analysis for D2R-GoK46E-β1γ2-scFv16 bound to dopamine.**

(A) Select motion corrected cryo-EM micrograph of D2R-GoK46E-β1γ2-scFv16 particles imaged at a nominal magnification of 45,000 and select two-dimensional class averages.

(B) 2D plot of the gold standard Fourier shell correlation (GSFSC) and orientational distribution heat map obtained during refinement using Cryosparc.

(C) Local cryo-EM density maps of TM1-7, G protein and dopamine.

(D) Local resolution heat-map calculated using the Local Resolution Estimation within Cryosparc. Figure generated using ChimeraX.



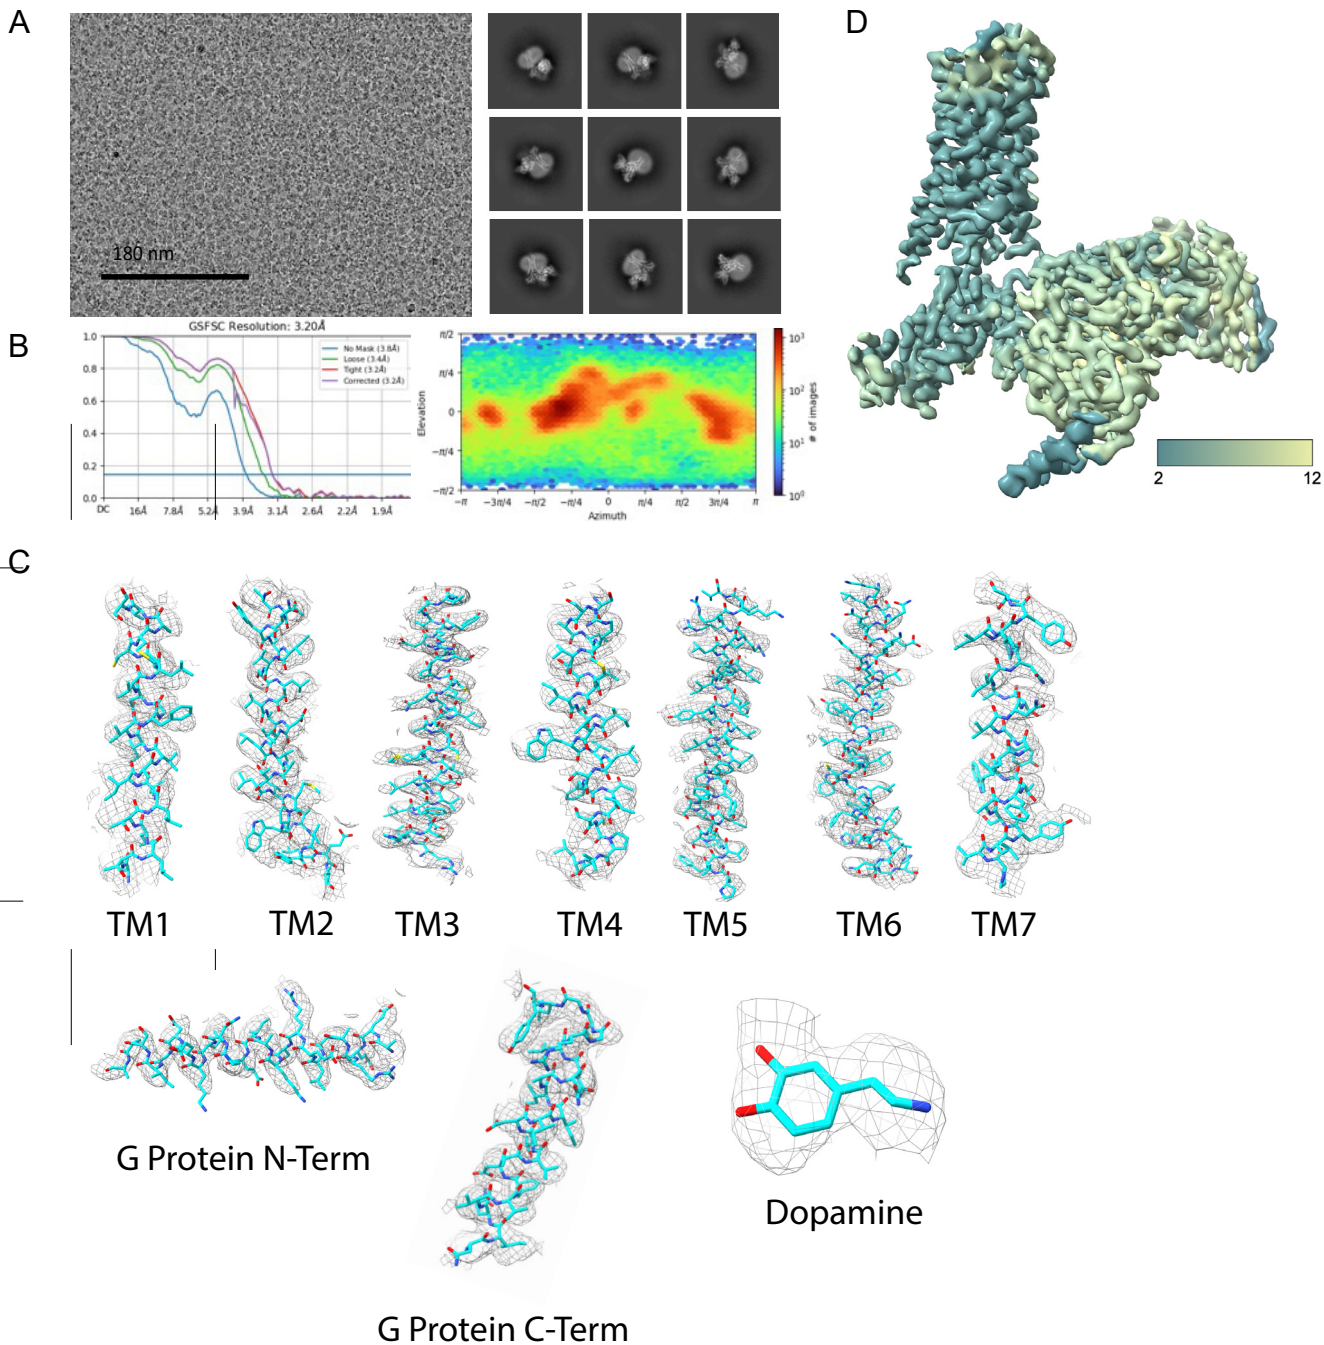

**Supplementary Figure 5. Extended Cryo-EM analysis for D2R-G<sub>o</sub><sup>K46E</sup>-β<sub>1</sub>γ<sub>2</sub> bound to dopamine.**

(A) Select motion corrected cryo-EM micrograph of D2R-G<sub>o</sub><sup>K46E</sup>-β<sub>1</sub>γ<sub>2</sub> particles imaged at a nominal magnification of 45,000 and select two-dimensional class averages.

(B) 2D plot of the gold standard Fourier shell correlation (GSFSC) and orientational distribution heat map obtained during refinement using Cryosparc.

(C) Local cryo-EM density maps of TM1-7, G protein and dopamine.

(D) Local resolution heat-map calculated using the Local Resolution Estimation within Cryosparc. Figure generated using ChimeraX.

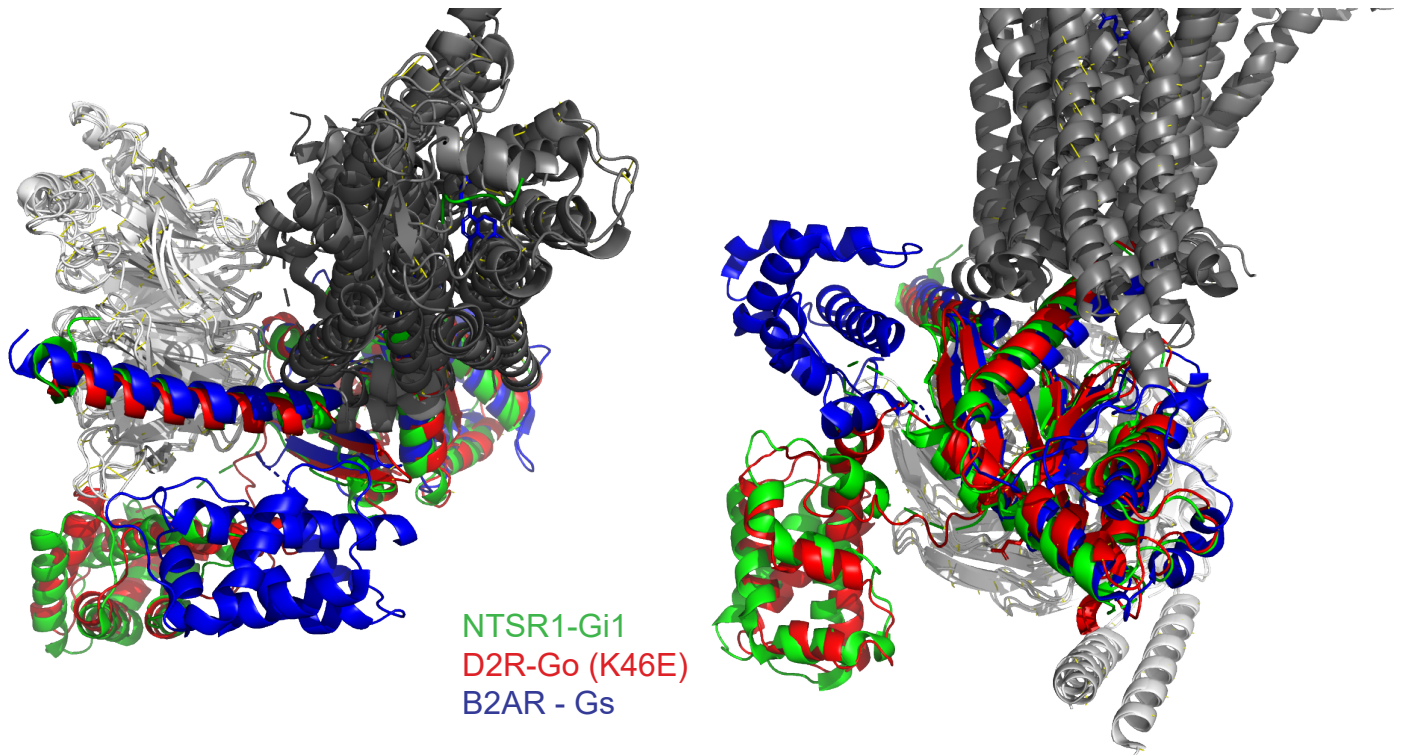

Top-down view

Side view

**Supplementary Figure 6. Structural comparison of all-helical domains in three GPCR structures.**

Overlay of NTSR1-G<sub>i1</sub> (Green; PDB ID: 7L0Q [<https://doi.org/10.2210/pdb7L0Q/pdb>]), B2AR-G<sub>s</sub> (Blue, PDB ID: 3SN6 [<https://doi.org/10.2210/pdb3SN6/pdb>]), D2R-G<sub>o</sub><sup>K46E</sup> (Red, PDB ID: 8U02 [pending]). GPCRs, dark grey; G $\beta$  $\gamma$ , light grey.
